# Supplementary material
Source: Springer Nature journal article supplement (https://www.springermedizin.de/resource/supplementary/13054_2014_2580_MOESM1_ESM.pdf/9714320)

Start

Initialization

I:E ratio goal

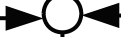

30-s Wait

Ventilation

Adjustment of PEEP and  $FiO_2$  according to Table 1

Oxygenation goal

Is a pH value entered?

Yes

No

Adjustment of RR and  $V_T$

pH goal

Timer = 10 mins  
or  $\Delta PEEP \neq 0$   
or  $\Delta V_T \neq 0$

No

Yes

Adjustment of  $V_T$

Plateau pressure goal

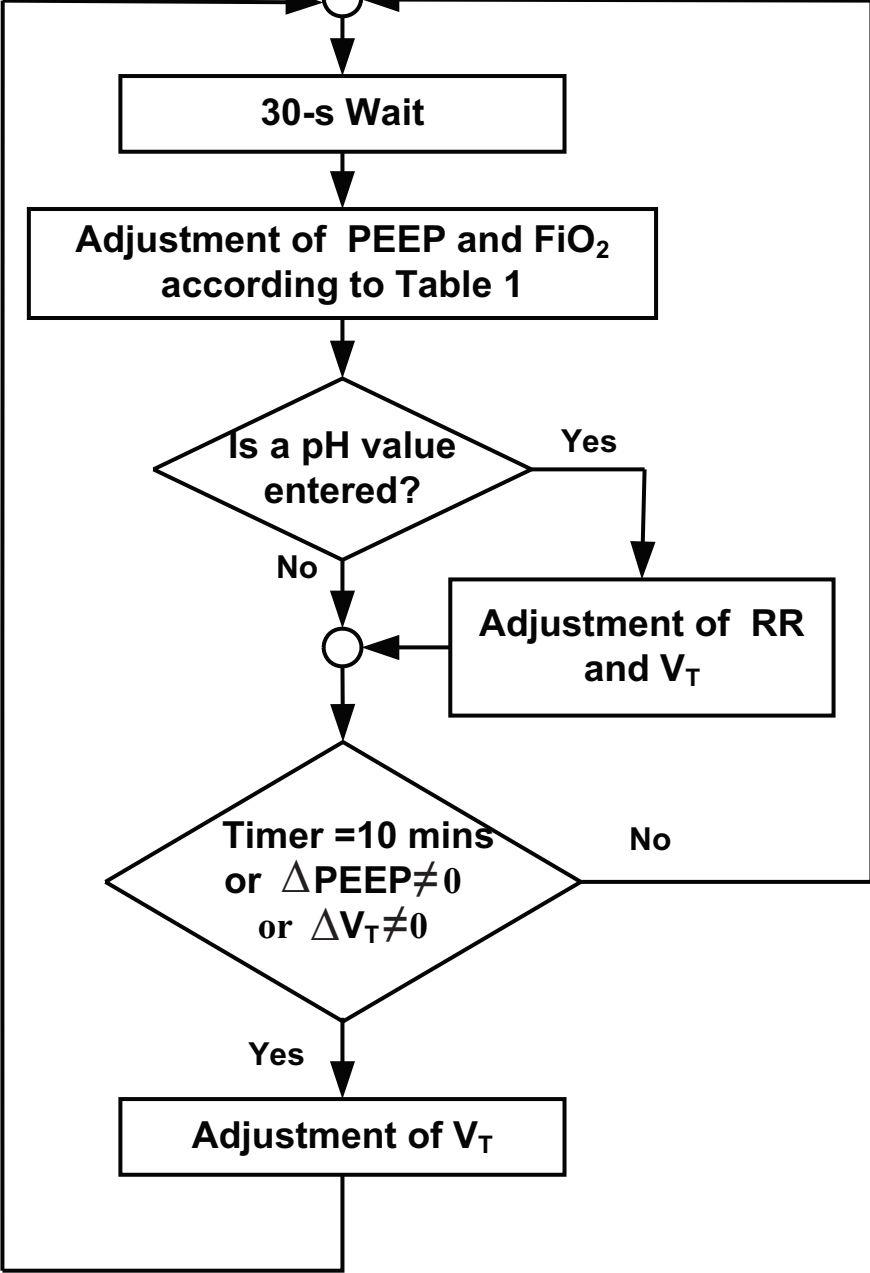

Supplement: MOESM1 [file 9714320]
